# Supplementary material
Source: publisher figshare collection journal article supplement (https://gsajournals.figshare.com/ndownloader/files/18536435)
Supplement: Supplementary file 1 [file 18536435]

## Sheet: Supplemental Table S3
Supplemental Table S3. Best fitted models used to calculate best linear unbiased predictors (BLUPs) for adult maize leaf cuticular conductance (gc) and flowering time (days to anthesis) for each of four single environments [Maricopa (MA) and San Diego (SD) in 2016 and 2017; MA16, SD16, MA17, SD17], in a location (MA and SD), and across all four environments (AllEnv) according to a likelihood rati…
	Cuticular conductance (gc)							Flowering time
Sources of variationa	MA16	SD16	MA17	SD17	MA	SD	AllEnv	MA16	SD16	MA17	SD17	MA	SD	AllEnv
Env	-	-	-	-	*	*	*	-	-	-	-	*	*	*
Block(Env)	x	*	x	*	x	*	x	x	*	*	*	*	*	*
Column(Env)	x	x	x	x	x	x	x	x	x	x	x	x	x	x
Genotype	*	*	*	*	*	*	*	*	*	*	*	*	*	*
Genotype×Env	-	-	-	-	*	*	*	-	-	-	-	*	*	*
aBlock(Env), block nested within environment; Column(Env), column nested within environment; Env, environment; Genotype, genotype; Genotype×Env, genotype-by-environment interaction
